# Supplementary material for: To switch or not to switch – a machine learning approach for ferroelectricity
Source: Royal Society of Chemistry journal article supplement (doi:10.1039/c9na00731h), 2020-01-01
Supplement: c9na00731h1.pdf [file c9na00731h1.pdf]

## SUPPLEMENTARY INFORMATION

### **To Switch or Not to Switch – a Machine Learning Approach for Ferroelectricity**

Sabine M. Neumayer<sup>1</sup>, Stephen Jesse<sup>1</sup>, Gabriel Velarde<sup>2</sup>, Andrei L. Kholkin<sup>3</sup>, Ivan Kravchenko<sup>1</sup>,

Lane W. Martin<sup>2</sup>, Nina Balke<sup>1</sup>, Peter Maksymovych<sup>1\*</sup>

<sup>1</sup> Center for Nanophase Materials Sciences, Oak Ridge National Laboratory, Oak Ridge, TN 37831, USA

<sup>2</sup> Department of Materials Science and Engineering, University of California, Berkeley, Berkeley, CA 94720, USA & Materials Sciences Division, Lawrence Berkeley National Laboratory, Berkeley, CA 94720, USA

<sup>3</sup> Department of Physics & CICECO -Aveiro Institute of Materials, University of Aveiro, Aveiro, Portugal & School of Natural Sciences and Mathematics, Ural Federal University, Ekaterinburg, Russia

\*maksymovychp@ornl.gov

## Section I

Experimental cKPFM data and interpolation extracted from cKPFM maps shown in Figure 3 for (a) PZT and (b) aHfO<sub>2</sub> between data points. Interpolation was performed using the scikit-image transform function.<sup>40</sup>

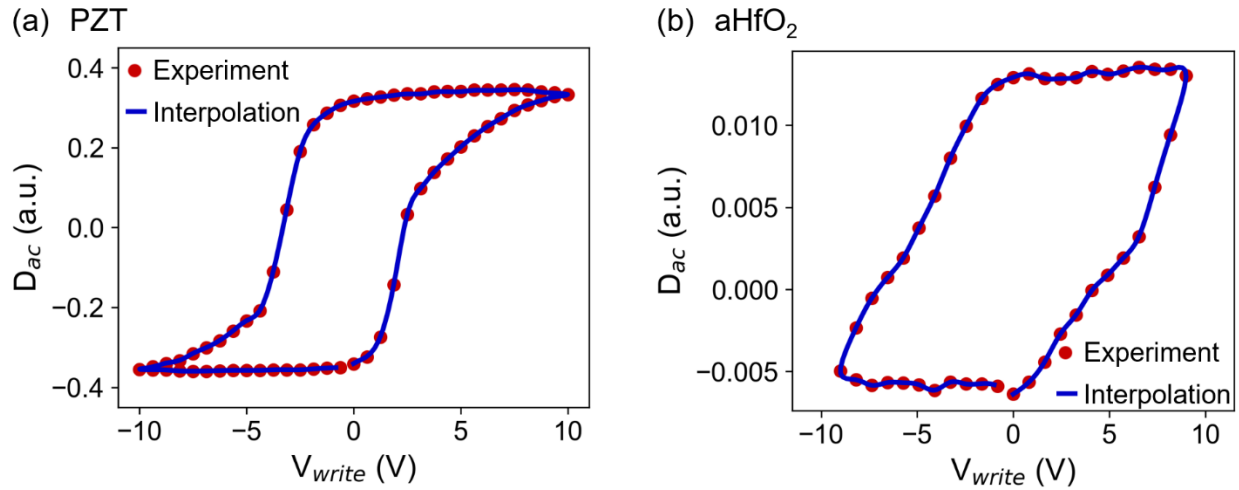

**Figure S1:** Experimental and interpolated response data measured (a) on PZT as a function of  $V_{write}$  and (b) on aHfO<sub>2</sub>. Data were extracted from the cKPFM maps shown in Figure 3 at  $v_{read} = 0$  V.

## Section II

Maps of experimental and interpolated cKPFM data and their x- and y- gradients shown for different  $V_{read}$  and  $V_{write}$  amplitudes for PZT (Figure S2) and aHfO<sub>2</sub> (Figure S3).

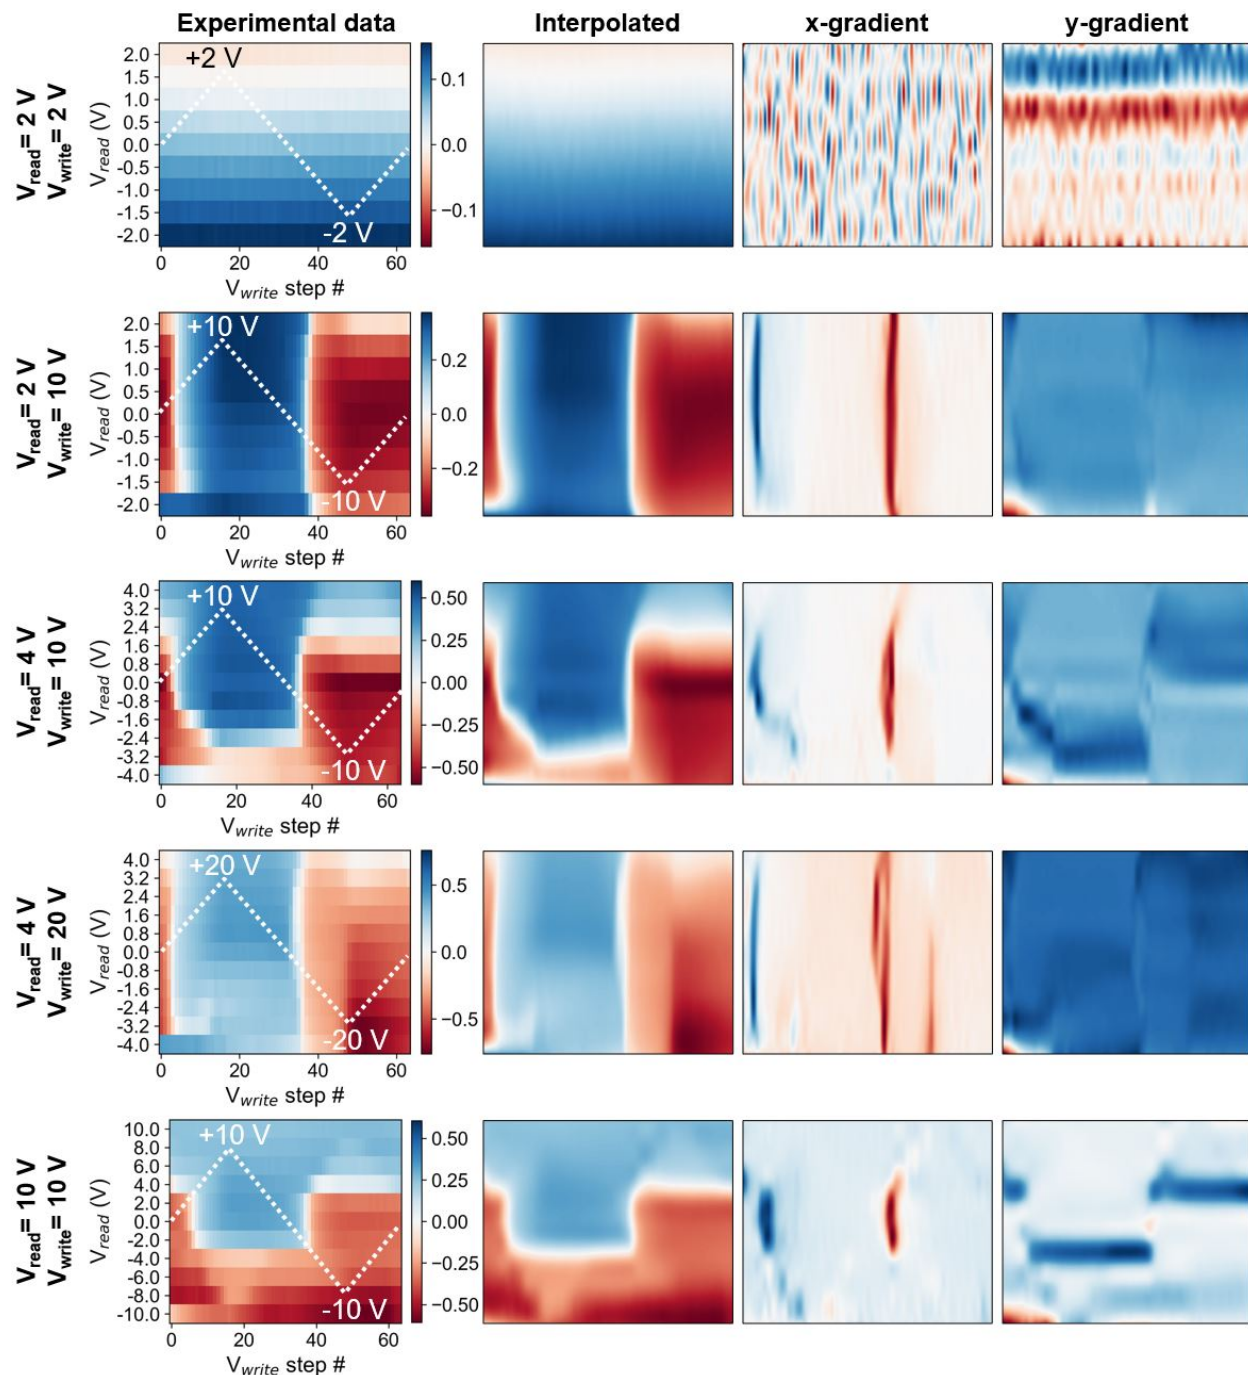

**Figure S2:** Maps of experimental cKPFM data acquired on PZT, interpolated data and the gradients in x- and y-direction calculated from interpolated maps. The  $V_{\text{read}}$  and  $V_{\text{write}}$  ratios vary according to the labels on the left. The first row shows response to sub-coercive read and write voltages.

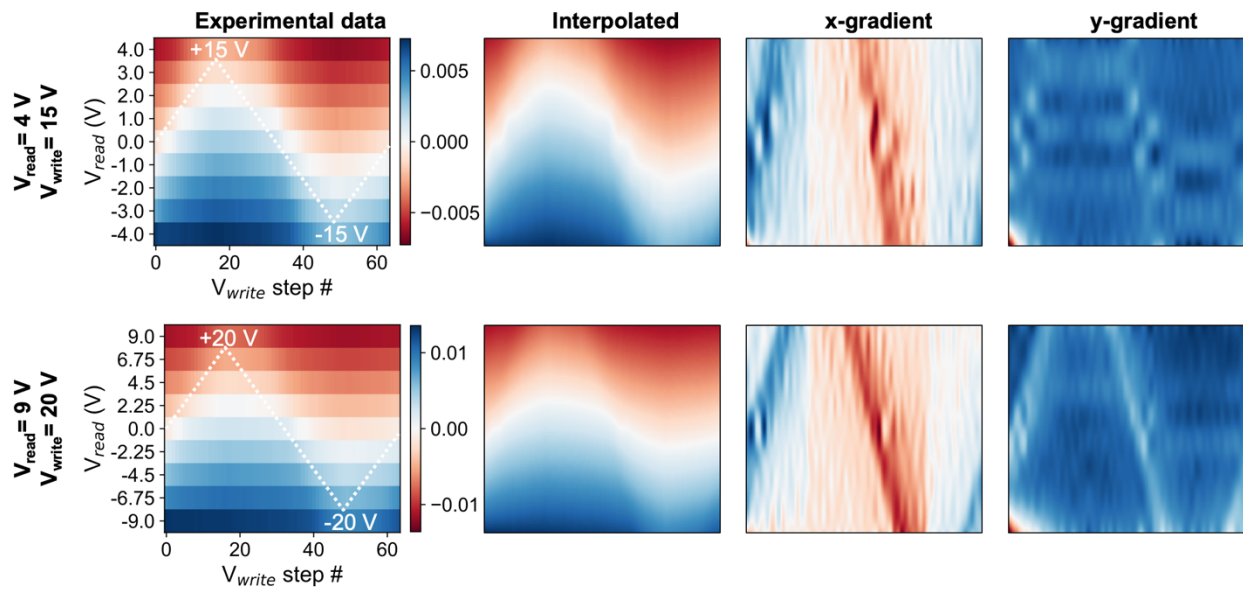

**Figure S3:** Maps of experimental cKPFM data acquired on  $\text{aHfO}_2$ , interpolated data and the gradients in x- and y-direction calculated from interpolated maps. The  $V_{\text{read}}$  and  $V_{\text{write}}$  amplitudes vary according to the labels on the left.

### Section III

A multilayer perceptron ANN was trained on cKPFM maps within the data set shown in Figure 5(a), where 100 maps were acquired at 7 different temperature steps on PLZT across the ferroelectric – relaxor phase transition. Subsequently, the ANN was used to identify the temperature at which test data sets were measured.

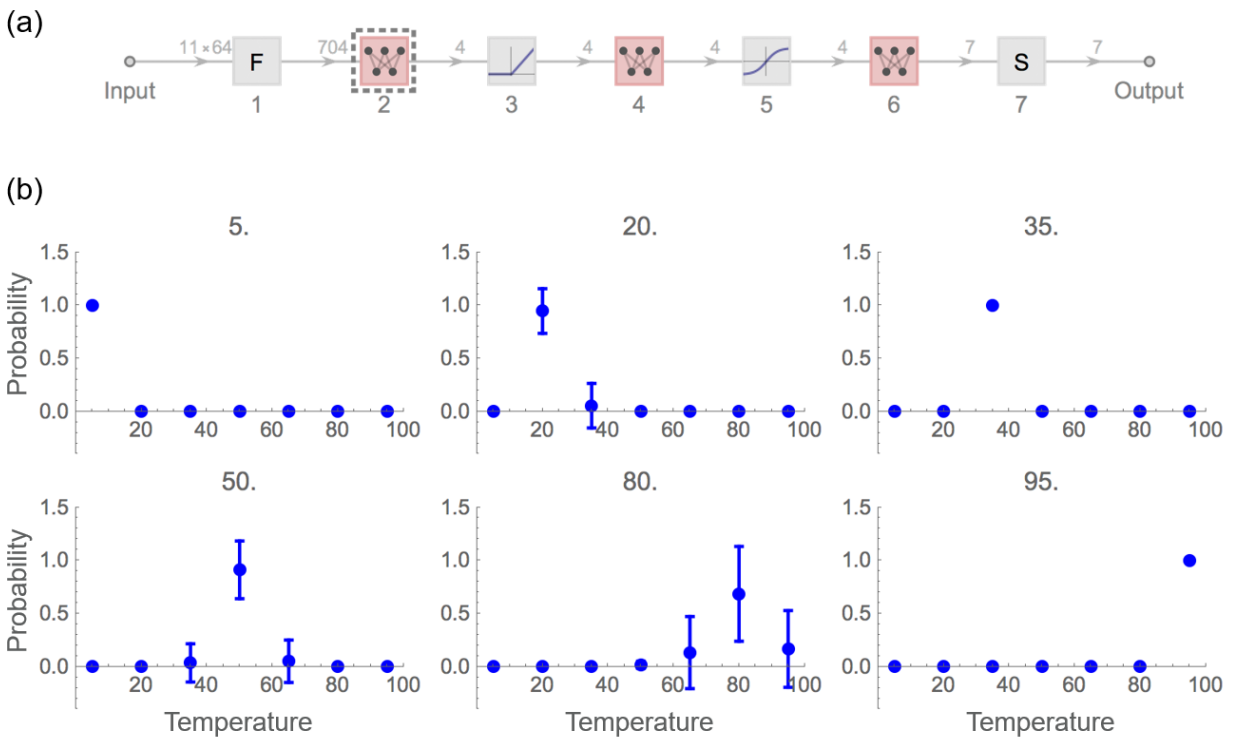

**Figure S4:** (a) Graph of linear multi-perceptron neural network used to predict temperatures based on the structure of the 2D response function. Layer structure of the network is as follows: (1) flattening image into a 704-dimensional vector; (2) mapping into 4 layer perceptron; (3) rectifying activation; (4) another mapping into 4 layer perceptron; (5) sigmoid activation; (6) mapping into 7 layer perceptron; (7) softmax normalization layer for normalization into class labels (each corresponding to specific temperature); (b) shows the average performance of the network to predict a specific temperature (labeled at the top) obtained by applying the network to validation data-set. (x – axis in each plot is the temperature in C; y-axis is the probability of predicted temperature)
